# Supplementary material for: Leucine Supplementation Improves Diastolic Function in HFpEF by HDAC4 Inhibition
Source: MDPI journal article supplement (doi:10.3390/cells12212561), 2023-11-02
Supplement: s1 [file s1]

## Supplementary

**Supplementary Table S1:** Specific primer sequences.

| mRNA           | Forward Sequence       | Reverse Sequence       | Gene bank ID |
|----------------|------------------------|------------------------|--------------|
| Anp            | TCCCGTATACAGTGCGGTGTC  | GGAGGCATGACCTCATCTTC   | NM_012612    |
| Bnp            | ACAATCCACGATGCAGAAGC   | GAAGGCGCTGTCTTGAGACC   | NM_031545    |
| Nox2           | TGTGGCTGTGATAAGCAGGAG  | AATCCCAGCTCCCACTAACATC | NM_023965    |
| Col1a1         | CTGCACGAGTCACACCGGAA   | CCAATGTCCAAGGGAGCCAC   | NM_053304    |
| Col3a1         | TGGCTGCACTAAACACACTG   | CCAATGTCATAGGGTGCGAT   | NM_032085    |
| Lox            | CGGTTACTTCCAGTACGGTCTC | CCGCCCTATATGCTGAACTG   | NM_017061    |
| TGF- $\beta$ 1 | CAGTGGCTGAACCAAGGAGAC  | CTCGACGTTTGGGACTGATCC  | NM_021578    |
| Polr2a         | GGTATTGAGCAGATCAGCAAGG | CAATGCCCAGTACCGTGAAG   | XM_343922    |
| Rpl-32         | GGTGAAGCCCAAGATCGTCAA  | TCTGGGTTTCCGCCAGTTTC   | NM_013226.2  |
